# Supplementary material
Source: PubMed Central journal article supplement (PMC6626832)
Supplement: mmc1.pdf [file mmc1.pdf]

**Biophysical Journal, Volume 117**

**Supplemental Information**

**Taking Simultaneous Snapshots of Intrinsically Disordered Proteins in  
Action**

**Marco Schiavina, Maria Grazia Murrari, Letizia Pontoriero, Valerio Sainati, Rainer  
Kümmerle, Wolfgang Bermel, Roberta Pierattelli, and Isabella C. Felli**

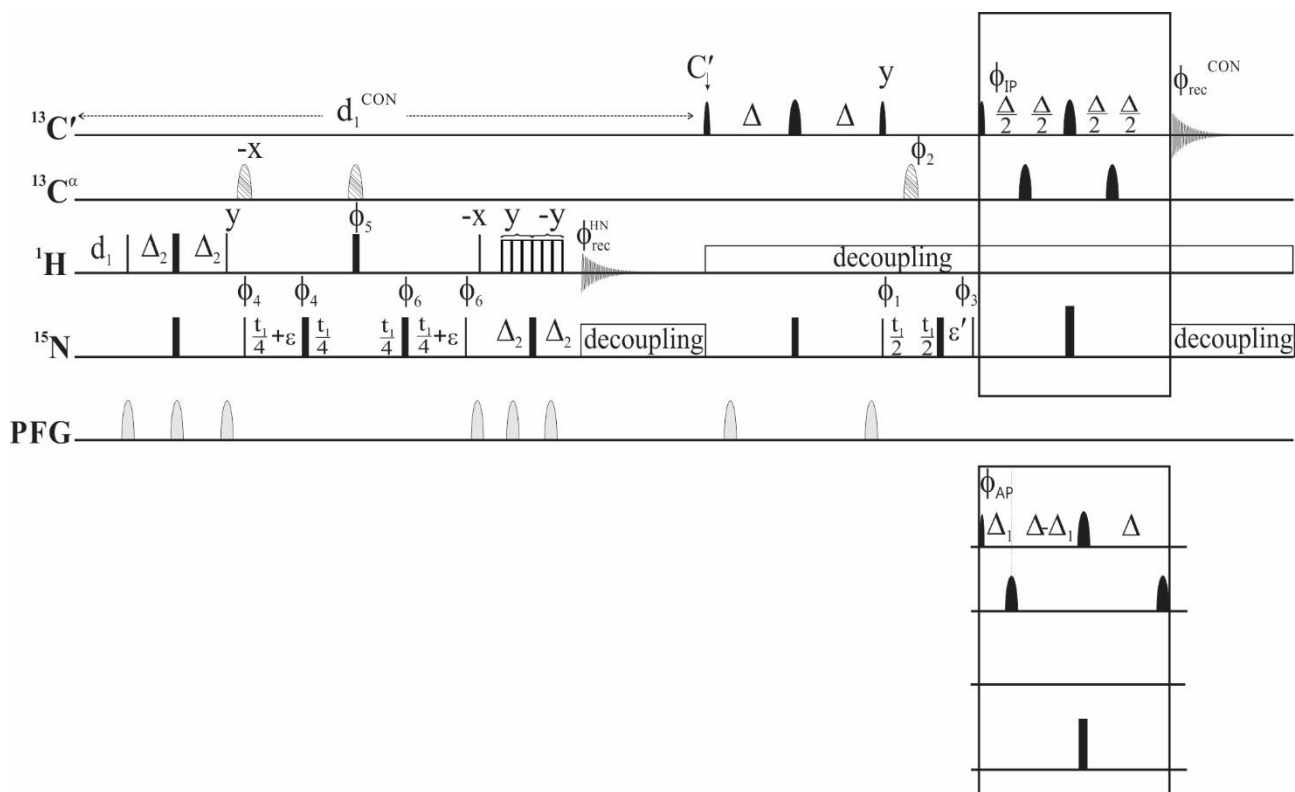

**Figure S1.** CON//HN pulse sequence scheme.

Narrow and wide black rectangles represent  $\pi/2$  and  $\pi$  non-selective pulses; narrow and wide black symbols represent  $\pi/2$  and  $\pi$  band-selective pulses (Q5 and Q3 shapes of 300 and 231  $\mu\text{s}$  respectively), hatched pulses are adiabatic inversion pulse on  $C'$  and  $C^\alpha$  (smoothed Chirp 500  $\mu\text{s}$  80 kHz sweep and 20% smooting).

The following phase cycling was employed for the CON//HN:  $\phi_1 = x, -x$ ;  $\phi_2 = 2(x), 2(-x)$ ;  $\phi_3 = 4(x), 4(-x)$ ,  $\phi^{\text{IP}} = x$ ;  $\phi^{\text{AP}} = -y$  and  $\phi_{\text{rec}}^{\text{CON}} = x, -x, x, -x, -x, x, -x, x$  for the 2D-CON and  $\phi_4 = x, -x$ ,  $\phi_5 = 2(x), 2(-x)$   $\phi_6 = 4(x) 4(-x)$  and  $\phi_{\text{rec}}^{\text{HN}} = x, -x, x, -x, -x, x, -x, x$  for the 2D-HN. Quadrature detection in the indirect dimension was achieved through the STATES-TPPI approach incrementing phase  $\phi_1$  (CON) and  $\phi_4$  (HN).

The length of the delays was:  $d_1 = 1.7$  s;  $\Delta = 16.6$  ms;  $\Delta_1 = 4.5$  ms;  $\Delta_2 = 2.7$  ms;  $\varepsilon = \frac{1}{2}$  duration of adiabatic pulse (250  $\mu\text{s}$ );  $\varepsilon' = t_1(0) +$  duration of adiabatic pulse (500  $\mu\text{s}$ ).

Virtual decoupling of the  $C'-C^\alpha$  coupling in the 2D-CON was achieved by acquiring for each increment both the IP and AP component of the signals and combining them.

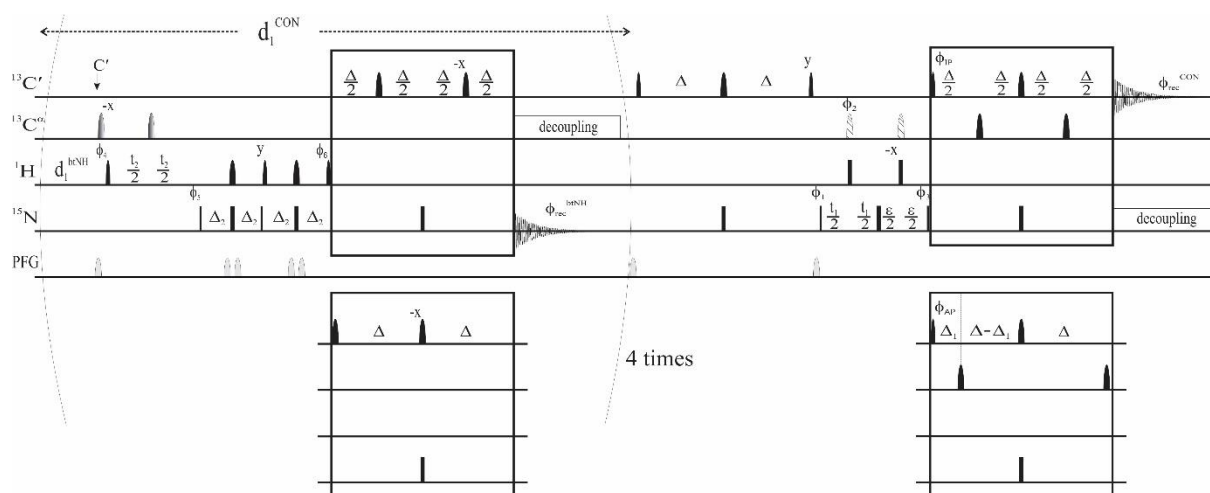

**Figure S2.** CON//btNH pulse sequence scheme.

Narrow and wide black rectangles represent  $\pi/2$  and  $\pi$  non-selective pulses; narrow and wide black symbols represent  $\pi/2$  and  $\pi$  band-selective pulses (Q5 and Q3 shapes of 300 and 231  $\mu\text{s}$  respectively), hatched pulses are adiabatic inversion pulse on  $C'$  and  $C^\alpha$  (smoothed Chirp 500  $\mu\text{s}$  80 kHz sweep and 20% smoothing), the shaded shapes are Bip pulses.

The following phase cycling was employed for the CON//btNH:  $\phi_1 = x, -x$ ;  $\phi_2 = 2(x), 2(-x)$ ;  $\phi_3 = 4(x), 4(-x)$  and  $\phi_{\text{rec}}^{\text{CON}} = x, -x, x, -x, -x, x, -x, x$  for the 2D-CON and  $\phi_4 = y, -y, x, -x$ ;  $\phi_5 = y$   $\phi_6 = x$  and  $\phi_{\text{rec}}^{\text{btNH}} = x, -x, -y, y$  for the 2D-btNH. Quadrature detection in the indirect dimension was achieved through the STATES-TPPI approach incrementing phase  $\phi_1$  for the CON and through the Echo/Antiecho approach by incrementing phase  $\phi_4$  and  $\phi_5$ .

The length of the delays was:  $d_1 = 2.35$  s;  $\Delta = 16.6$  ms;  $\Delta_1 = 4.5$  ms;  $\Delta_2 = 2.7$  ms;  $\varepsilon = t_1(0) + \text{duration of adiabatic pulse (500 } \mu\text{s)}$ .

Virtual decoupling of the  $C'-C^\alpha$  coupling in the 2D-CON was achieved by acquiring for each increment both the IP and AP component of the signals. The same approach was also employed to achieve heteronuclear decoupling ( $C'-N$ ) during acquisition of the  $^{15}\text{N}$  FIDs in order to preserve the  $C'$  polarization for the subsequent CON experiment. Band selective  $C^\alpha$  decoupling was achieved using a Q3 pulse in a P5M4 supercycle.

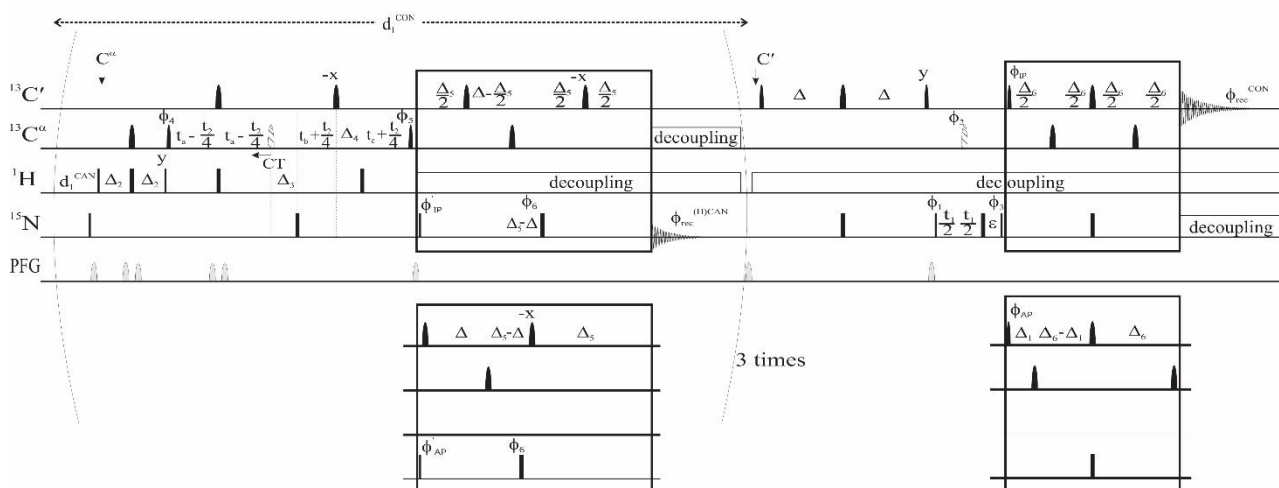

**Figure S3.** CON//(H)CAN pulse sequence scheme.

Narrow and wide black rectangles represent  $\pi/2$  and  $\pi$  non-selective pulses; narrow and wide black symbols represent  $\pi/2$  and  $\pi$  band-selective pulses (Q5 and Q3 shapes of 300 and 231  $\mu\text{s}$  respectively), hatched pulses are adiabatic inversion pulse on  $C'$  and  $C^\alpha$  (smoothed Chirp 500  $\mu\text{s}$  80 kHz sweep and 20% smooting).

The following phase cycling was employed for the CON//(H)CAN:  $\phi_1 = x, -x$ ;  $\phi_2 = 2(x), 2(-x)$ ;  $\phi_3 = 4(x), 4(-x)$ ;  $\phi^{IP} = x$ ;  $\phi^{AP} = -y$  and  $\phi_{\text{rec}}^{\text{CON}} = x, -x, x, -x, -x, x, -x, x$  for the 2D-CON and  $\phi_4 = x, -x$ ,  $\phi_5 = 4(x), 4(-x)$ ,  $\phi_6 = 8(x), 8(-x)$ ;  $\phi'^{IP} = 2(x), 2(-x)$ ;  $\phi'^{AP} = 2(y), 2(-y)$  and  $\phi_{\text{rec}}^{(\text{H})\text{CAN}} = x, -x, -x, x, -x, x, x, -x$  for the 2D-(H)CAN. Quadrature detection in the indirect dimension was achieved through STATES-TPPI approach incrementing phase  $\phi_1$  (CON) and  $\phi_4$  ((H)CAN).

The length of the delays was:  $d_1 = 2.5$  s;  $\Delta = 12.4$  ms;  $\Delta_1 = 4.5$  ms;  $\Delta_2 = 1.7$  ms;  $\Delta_3 = 1.9$  ms;  $\Delta_4 = 1.4$  ms;  $\Delta_5 = 4.2$  ms;  $\Delta_6 = 16.6$  ms.  $t_a$ ,  $t_b$  and  $t_c$  were used to achieve the constant time mode for the  $^{13}\text{C}^\alpha$  indirect dimension.

Virtual decoupling of the  $C'-C^\alpha$  coupling in the CON was achieved by acquiring for each increment both the IP and AP component of the signals. The same approach was also employed to achieve heteronuclear decoupling ( $C'-N$ ) during acquisition of the  $^{15}\text{N}$  FIDs in order to preserve the  $C'$  polarization for the subsequent CON experiment. Band selective  $C^\alpha$  decoupling was achieved using a Q3 pulse in a P5M4 supercycle.

## Pulse sequence CON//HN

```
;ut_con_fhsqchn
;avance-version

;Dataset 1 (F1)
;fhsqcf3gpph
;avance-version (12/01/11)
;2D H-1/X correlation via double inept transfer
;
;      F1(HN) -> F3(N,t1) -> F1(HN,t2)
;
;phase sensitive
;with decoupling during acquisition
;
;(S. Mori, C. Abeygunawardana, M. O'Neil-Johnson & P.C.M. van Zijl,
;  J. Magn. Reson. B 108, 94-98 (1995) )
;
;$CLASS=HighRes
;$DIM=2D
;$TYPE=
;$SUBTYPE=
;$COMMENT=

;Dataset 2 (F2)
;CON
;2D sequence with
;  13C detected correlation for triple resonance using
;    inept transfer steps
;
;      F1(C=O) -> F3(N,t1) -> F1(C=O,t2)
;
;on/off resonance 13C pulses using shaped pulses
;phase sensitive (t1)
;using IPAP scheme for virtual decoupling
;(use parameterset C_CON_IASQ)
;
;W. Bermel, I. Bertini, L. Duma, I.C. Felli, L. Emsley, R. Pierattelli,
;  P.R. Vasos, Angew. Chem. Int. Ed. 44, 3089-3092 (2005)
;(L. Duma, S. Hediger, A. Lesage & L. Emsley,
;  J. Magn. Reson. 164, 187-195 (2003) )
;
;$CLASS=HighRes
;$DIM=2D
;$TYPE=
;$SUBTYPE=
;$COMMENT=

prosol relations=<triple>

#include <Avance.incl>
#include <Delay.incl>
#include <Grad.incl>

"p2=p1*2"
"p22=p21*2"
"d11=30m"
"d12=20u"
"d26=1s/(cnst4*4)"

"d22=4.5m"
"d23=16.6m"

"in31=in1/2"
"in32=in2/2"
```

```

"d31=3u"
"d32=3u"

"DELTA=d19-p22/2"
"DELTA1=d26-p16-d16-p27*3-d19*5-p1*2/PI"
"DELTA2=d26-p16-d16-p27*2-p0-d19*5-de-8u"
"DELTA3=d31+larger(p2,p8)/2"
"DELTA4=p21*2/PI"
"DELTA5=d32*2+p8"
"DELTA6=d23/2-p14/2"
"DELTA7=d23-d22-p14"

"TAU=d26-p16-d16-4u"

"l0=1"

"l3=td1/2"

"spoff2=0"
"spoff3=0"
"spoff5=bf2*((cnst22-cnst21)/1000000)"
"spoff8=0"
"spoff13=bf2*((cnst26-cnst21)/1000000)"

1 4u ze1
   4u ze2

2 d11 do:f1 do:f3
   3m
3 12m
4 6m
5 d1

; fhsqc

20u fq=cnst47(bf ppm):f3
d12 p11:f1 p13:f3
50u UNBLKGRAD

(p1 ph11)
4u
p16:gp1
d16
TAU p13:f3
(center (p2 ph11) (p22 ph16):f3 )
4u
TAU
p16:gp1
d16
(p1 ph12)

4u
p16:gp2
d16
(p8:sp13 ph17):f2
4u

(p21 ph13):f3
DELTA3
(p22 ph13):f3
DELTA4
d31

(center (p2 ph15) (p8:sp13 ph11):f2 )

```

```

d31
DELTA4
(p22 ph14):f3
DELTA3
(p21 ph14):f3

4u
p16:gp2
d16

(p1 ph17)
p16:gp3
d16 p118:f1
DELTA1
p27*0.231 ph18
d19*2
p27*0.692 ph18
d19*2
p27*1.462 ph18
DELTA
(p22 ph11):f3
DELTA
p27*1.462 ph19
d19*2
p27*0.692 ph19
d19*2
p0*0.231 ph19
4u
p16:gp3
d16
4u BLKGRAD
DELTA2 p116:f3

goscnp1 ph31 cpd3:f3

; con

4u do:f3
50u UNBLKGRAD

p16:gp5
d16

20u p119:f1 p13:f3
20u fq=cnst21(bf ppm):f2
20u fq=cnst57(bf ppm):f3
d12 cpds1:f1

(p13:sp2 ph1):f2
d23
(center (p14:sp3 ph1):f2 (p22 ph1):f3 )
d23
(p13:sp8 ph2):f2

p16:gp4
d16

(p21 ph3):f3
d32
(p8:sp13 ph5):f2
d32
(p22 ph1):f3
DELTA5
(p21 ph4):f3

if "l0 %2 == 1"
{
(p13:sp2 ph1):f2
DELTA6

```

```

        (p14:sp5 ph1):f2
        DELTA6
        (center (p14:sp3 ph1):f2 (p22 ph1):f3 )
        DELTA6
        (p14:sp5 ph1):f2
        DELTA6 pl16:f3
    }
else
    {
        (p13:sp2 ph6):f2
        d22
        (p14:sp5 ph1):f2
        DELTA7
        (center (p14:sp3 ph1):f2 (p22 ph1):f3 )
        DELTA6
        DELTA6 pl16:f3
        (p14:sp5 ph1):f2
    }

4u BLKGRAD
go2=2 ph30 cpd3:f3

d11 do:f1 do:f3 wr2 #1 if2 #1 zd2

;exp_f2 ipap
3m iu0
lo to 3 times 2

3m wr1 #0 if1 #0 zd1

;exp_f1 phase
3m ip13
3m ip16
;exp_f2 phase
3m ip3
lo to 4 times 2

;exp_f1 delay
3m id31
;exp_f2 delay
3m id32
lo to 5 times 13

exit

ph1=0
ph2=1
ph3=0 2
ph4=0 0 0 0 2 2 2 2
ph5=0 0 2 2
ph6=3

ph11=0
ph12=1
ph13=0 2
ph14=0 0 0 0 2 2 2 2
ph15=0 0 2 2
ph16=0
ph17=2
ph18=1
ph19=3

ph30=0 2 0 2 2 0 2 0
ph31=0 2 0 2 2 0 2 0

;p11 : f1 channel - power level for pulse (default)
;p13 : f3 channel - power level for pulse (default)
;p116: f3 channel - power level for CPD/BB decoupling
;p118: f1 channel - power level for 3-9-19-pulse (watergate)

```



```

;p119: f1 channel - power level for CPD/BB decoupling
;sp2 : f1 channel - shaped pulse 90 degree (on resonance)
;sp3 : f1 channel - shaped pulse 180 degree (on resonance)
;sp5 : f1 channel - shaped pulse 180 degree (Ca off resonance)
;sp8 : f1 channel - shaped pulse 90 degree (on resonance)
;
;      for time reversed pulse
;sp13: f1 channel - shaped pulse 180 degree (adiabatic)
;p0 : f1 channel - 90 degree pulse at p118
;
;      use for fine adjustment
;p1 : f1 channel - 90 degree high power pulse
;p2 : f1 channel - 180 degree high power pulse
;p8 : f1 channel - 180 degree shaped pulse for inversion (adiabatic)
;p13: f1 channel - 90 degree shaped pulse
;p14: f1 channel - 180 degree shaped pulse
;p16: homospoil/gradient pulse [1 msec]
;p21: f3 channel - 90 degree high power pulse
;p22: f3 channel - 180 degree high power pulse
;p27: f1 channel - 90 degree pulse at p118
;d1 : relaxation delay; 1-5 * T1
;d11: delay for disk I/O [30 msec]
;d12: delay for power switching [20 usec]
;d16: delay for homospoil/gradient recovery
;d19: delay for binomial water suppression
;d22: 1/(4J(COCa)) [4.5 msec]
;d23: 1/(4J(NCO)) [16.6 msec]
;d26: 1/(4J(NH))
;d31: incremented delay (2D, exp 1) [3 usec]
;d32: incremented delay (2D, exp 2) [3 usec]
;cnst4: = J(NH)
;cnst21: CO chemical shift (offset, in ppm)
;cnst22: Calpha chemical shift (offset, in ppm)
;cnst26: Call chemical shift (offset, in ppm) [101 ppm]
;cnst47: N(H) chemical shift (offset, in ppm)
;cnst57: N chemical shift (offset, in ppm)
;olp: CO chemical shift (cnst21)
;l0: flag to switch between inphase and antiphase
;l3 : loop for 2D experiment = tdl/2
;inf1: 1/SW(N) = 2 * DW(N)
;in2 : 1/SW(N) = 2 * DW(N) (inf1 of exp 2, N all)
;in31: 1/(2 * SW(N)) = DW(N)
;nd31: 2
;in32: 1/(2 * SW(N)) = DW(N)
;nd32: 2
;ns: 8 * n
;ds: >= 32
;td1: number of experiments in F1
;
;      (number of experiments after IPAP processing)
;FnMODE: States-TPPI (or TPPI) in F1
;cpds1: decoupling according to sequence defined by cpdprg1
;cpd3: decoupling according to sequence defined by cpdprg3
;pcpd1: f1 channel - 90 degree pulse for decoupling sequence
;pcpd3: f3 channel - 90 degree pulse for decoupling sequence

;for z-only gradients:
;gpz1: 50%
;gpz2: 80%
;gpz3: 31%
;gpz4: 19%
;gpz5: 60%

;use gradient files:
;gpnam1: SMSQ10.100
;gpnam2: SMSQ10.100
;gpnam3: SMSQ10.100
;gpnam4: SMSQ10.100
;gpnam5: SMSQ10.100

;use AU-program splitcomb [ipap 2] to process data

;$Id: $

```

## Pulse sequence CON//btNH

```
;ut_con_n_btnh
;avance-version

;Dataset 1 (F1)
;c_con_iasq
;avance-version
;CON
;2D sequence with
; 13C detected correlation for triple resonance using
; inept transfer steps
;
; F1(C=O) -> F3(N,t1) -> F1(C=O,t2)
;
;on/off resonance 13C pulses using shaped pulses
;phase sensitive (t1)
;using IPAP scheme for virtual decoupling
;(use parameterset C_CON_IASQ)
;
;W. Bermel, I. Bertini, L. Duma, I.C. Felli, L. Emsley, R. Pierattelli,
; P.R. Vasos, Angew. Chem. Int. Ed. 44, 3089-3092 (2005)
;(L. Duma, S. Hediger, A. Lesage & L. Emsley,
; J. Magn. Reson. 164, 187-195 (2003) )
;
;
;Dataset 2 (F2)
;dummy dataset
;
;
;Dataset 3 (F3)
;nb_hntrosy_f2ig
;avance-version (17/02/10)
;2D 15N shift correlation
;
; F2(HN,t1) -> F3(N,t2)
;
;with refocussing of chemical shifts
;phase sensitive
;using semi-constant time in t1
;(use parameterset )
;
;(R. Schnieders, C. Richter, S. Warhaut, V. de Jesus, S. Keyhani,
; E. Duchardt-Ferner, H. Keller, J. WÄhnert, L.T. Kuhn, A.L. Breeze,
; W. Bermel, H. Schwalbe & B. FÄrtig, ; J. Biomol. NMR 69, 31Ä44 (2017) )
;(K. Takeuchi, H. Arthanari, I. Shimada & G. Wagner, J. Biomol. NMR 63, 1Ä9 (2015) )
;(K. Takeuchi, H. Arthanari, M. Imai & G. Wagner, J. Biomol. NMR 64, 143Ä151 (2016) )
;
;$CLASS=HighRes
;$DIM=2D
;$TYPE=
;$SUBTYPE=
;$COMMENT=

prosol relations=<triple_c>

#include <Avance.incl>
#include <Delay.incl>
#include <Grad.incl>

"p22=p21*2"
"d11=30m"
"d12=20u"
"d26=1s/(cnst4*4)"

"d22=4.5m"
```

```

"d23=16.6m"

"p42=(bwfac42/(cnst55*cnst52*bf2))*1000000"
"spw42=plw2/((p42*90.0)/(p3*totrot42))*((p42*90.0)/(p3*totrot42))*(integfac42*integ-
fac42)"
"spoa142=0.5"
"spoff42=bf2*(cnst54/1000000)-o2"

"p43=(bwfac43/(cnst55*cnst53*bf2))*1000000"
"spw43=plw2/((p43*90.0)/(p3*totrot43))*((p43*90.0)/(p3*totrot43))*(integfac43*integ-
fac43)"
"spw44=plw2/((p43*90.0)/(p3*totrot44))*((p43*90.0)/(p3*totrot44))*(integfac44*integ-
fac44)"
"spoa143=0"
"spoa144=1"
"spoff43=bf2*(cnst54/1000000)-o2"
"spoff44=bf2*(cnst54/1000000)-o2"

"in31=inf1/2"
"in32=in2/2"

"d31=3u"
"d32=in32/2-p39/2"

"d60=d1-(d61+d59)*4-d58"

"DELTA=d31"
"DELTA1=d23/2-p12/2"
"DELTA2=d23-d22-p12"
"DELTA11=d26-larger(p22,p42)/2-p16-d16"
"DELTA12=d26-larger(p22,p42)/2-p16-d16-p21*2/PI"
"DELTA13=d26-larger(p22,p42)/2-p16-d16-de"
"DELTA14=d23/2-p12/2"

"l0=0"
"l3=l22/2"
"l10=1"
"l13=td1/(8*122)"
"l30=0"

"spoff4=bf1*((cnst26-cnst22)/1000000)"
"spoff13=bf1*((cnst26-cnst21)/1000000)"
"spoff23=0"
"spoff24=0"
"spoff25=0"
"spoff26=bf1*((cnst22-cnst21)/1000000)"
"spoff27=bf1*((cnst21-cnst22)/1000000)"

1 4u ze1
   4u ze3
2 d11 do:f3
   3m
3 3m
4 3m
5 6m
6 9m
7 12.02m
8 3m

   d60
   50u UNBLKGRAD

goscnp2 ph31

```

```

p16:gp2
d16

;n_trhn

d12 p119:f1 p13:f3
20u fq=cnst22(bf ppm):f1

"cnst31=(130%2)*90"

3m ip18+cnst31

11 d61

(p39:sp4 ph17):f1

if "10 %2 == 1"
{
(p43:sp44 ph13+ph18):f2
}
else
{
(p43:sp44 ph14+ph18):f2
}
d32
(p39:sp4 ph1+ph18):f1
d32

(p21 ph15+ph18):f3
DELTA11
p16:gp3
d16
4u
(center (p42:sp42 ph1+ph18):f2 (p22 ph1+ph18):f3 )
4u
p16:gp3
d16
DELTA11
(p21 ph1+ph18):f3

(p43:sp43 ph2+ph18):f2
DELTA12
p16:gp4
d16
4u
(center (p42:sp42 ph1+ph18):f2 (p22 ph1+ph18):f3 )
4u
p16:gp4
d16
DELTA13
4u BLKGRAD
(p43:sp44 ph16+ph18):f2

if "130 %2 == 0"
{
DELTA14
(p12:sp27 ph1):f1
DELTA14
(p22 ph1):f3
DELTA14
(p12:sp27 ph17):f1
DELTA14 p119:f1
}
else
{
(p12:sp27 ph1):f1
DELTA14
DELTA14
(p22 ph1):f3
}

```

```

        (p12:sp27 ph17):f1
        DELTA14
        DELTA14 p119:f1
    }

goscnp3 ph30 cpd1:f1

4u do:f1
lo to 11 times 4

50u UNBLKGRAD

p16:gp5
d16

;con

20u p13:f3
20u fq=cnst21(bf ppm):f1

(p11:sp23 ph1)
d23
(center (p12:sp24 ph1) (p22 ph1):f3 )
d23
(p11:sp25 ph2)

p16:gp1
d16

(p21 ph3):f3
d31
(center (p8:sp13 ph5):f1 (p44:sp3 ph1):f2 )
d31
(p22 ph1):f3
DELTA
(center (p8:sp13 ph1):f1 (p44:sp3 ph7):f2 )
DELTA
(p21 ph4):f3

if "l10 %2 == 1"
{
    (p11:sp23 ph1)
    DELTA1
    (p12:sp26 ph1)
    DELTA1
    (center (p12:sp24 ph1) (p22 ph1):f3 )
    DELTA1
    (p12:sp26 ph1)
    DELTA1 p116:f3
}
else
{
    (p11:sp23 ph6)
    d22
    (p12:sp26 ph1)
    DELTA2
    (center (p12:sp24 ph1) (p22 ph1):f3 )
    DELTA1
    DELTA1 p116:f3
    (p12:sp26 ph1)
}

4u BLKGRAD

gol=2 ph31 cpd3:f3

d11 do:f3 wr1 #0 if1 #0 zd1
3m wr2 #1 if2 #1 zd2

;exp_f1 ipap

```

```

3m iu10
lo to 3 times 2

;exp_f1 phase
3m ip3
lo to 4 times 2

;exp_f1 delay
3m id31
lo to 5 times 113

3m wr3 #2 if3 #2 zd3

3m iu30
lo to 6 times 2

;exp_f2 phase
3m ip15*2
3m ip16*2
3m iu0
lo to 7 times 2

;exp_f2 delay
3m id32
3m
20u
3m
3m
lo to 8 times 13

exit

ph1=0
ph2=1
ph3=0 2
ph4=0 0 0 0 2 2 2 2
ph5=0 0 2 2
ph6=3
ph7=2
ph13=1 3 0 2
ph14=3 1 0 2
ph15=1
ph16=0
ph17=2
ph18=0
ph30=0 2 3 1
ph31=0 2 0 2 2 0 2 0

;p11 : f1 channel - power level for pulse (default)
;p13 : f3 channel - power level for pulse (default)
;p116: f3 channel - power level for CPD/BB decoupling
;p119: f1 channel - power level for CPD/BB decoupling
;sp3 : f2 channel - shaped pulse 180 degree (Bip720,50,20.1)
;sp4 : f1 channel - shaped pulse 180 degree (Bip720,100,10.1)
;sp13: f1 channel - shaped pulse 180 degree (adiabatic)
;sp23: f1 channel - shaped pulse 90 degree (on resonance)
;sp24: f1 channel - shaped pulse 180 degree (on resonance)
;sp25: f1 channel - shaped pulse 90 degree (on resonance)
;
;sp26: f1 channel - shaped pulse 180 degree (Ca off resonance)
;sp27: f1 channel - shaped pulse 180 degree (C=O off resonance)
;sp42: f2 channel - shaped pulse 180 degree (Reburp.1000)
;sp43: f2 channel - shaped pulse 90 degree (Eburp2.1000)
;sp44: f2 channel - shaped pulse 90 degree (Eburp2tr.1000)
;p8 : f1 channel - 180 degree shaped pulse for inversion (adiabatic)
;p11: f1 channel - 90 degree shaped pulse
;p12: f1 channel - 180 degree shaped pulse

```

```

;p16: homospoil/gradient pulse [1 msec]
;p21: f3 channel - 90 degree high power pulse
;p22: f3 channel - 180 degree high power pulse
;p39: f1 channel - 180 degree shaped pulse for refocussing
; Bip720,100,10.1 (160us at 600.13 MHz)
;p42: f2 channel - 180 degree shaped pulse for refocussing
; Reburp.1000 (1.4ms at 600.13 MHz)
;p43: f2 channel - 90 degree shaped pulse for excitation
; Eburp2.1000/Eburp2tr.1000 (1.7ms at 600.13 MHz)
;p44: f2 channel - 180 degree shaped pulse for refocussing
; Bip720,50,20.1 (200us at 600.13 MHz)
;d1 : relaxation delay; 1-5 * T1
;d11: delay for disk I/O [30 msec]
;d12: delay for power switching [20 usec]
;d16: delay for homospoil/gradient recovery
;d22: 1/(4J(COCa)) [4.5 msec]
;d23: 1/(4J(NCO)) [16.6 msec]
;d26: 1/(4J)NH
;d31: incremented delay (2D, exp 1)) [3 usec]
;d32: incremented delay (2D, exp 3)): in32/2-p39/2
;d58: = AQ of exp 2 (1H)
;d59: = AQ of exp 3 (15N)
;d60: relaxation delay as executed
;d61: relaxation delay of exp 3
;cnst4: = J(NH)
;cnst21: CO chemical shift (offset, in ppm)
;cnst22: Calpha chemical shift (offset, in ppm)
;cnst26: Call chemical shift (offset, in ppm) [101 ppm]
;cnst43: compensation of chemical shift evolution during p43
; Eburp2.1000: 0.69
;cnst52: scaling factor for p42 to compensate for transition region
; Reburp.1000: 1.426
;cnst53: scaling factor for p43 to compensate for transition region
; Eburp2.1000: 1.000
;cnst54: H(N) chemical shift (offset, in ppm)
;cnst55: H(N) bandwidth (in ppm)
;olp: CO chemical shift (cnst21)
;l0 : flag to switch between odd and even increments (exp 3)
;l3 : loop for 2D exp 1 = 122/2
;l13: loop for 2D exp 3 = td1/(8*122)
;l10: flag to switch between inphase and antiphase (exp 1)
;l22: number of experiments in F1 for exp 3 (after IPAP processing)
;l30: flag to switch between inphase and antiphase (exp 3)
;inf1: 1/SW(N) = 2 * DW(N)
;in2 : 1/SW(H) = 2 * DW(H) (inf1 of exp 3)
;in31: 1/(2 * SW(N)) = DW(N)
;nd31: 2
;in32: 1/(2 * SW(H)) = DW(H)
;nd32: 2
;ns: 8 * n
;ds: >= 32
;td1: number of experiments in F1
; (number of experiments after IPAP processing)
;FnMODE: States-TPPI (or TPPI) in F1
;cpd1: decoupling according to sequence defined by cpdprg1: p5m4sp180
;cpd3: decoupling according to sequence defined by cpdprg3
;pcpd1: f1 channel - 180 degree pulse for decoupling sequence
;pcpd3: f3 channel - 90 degree pulse for decoupling sequence
;cpdprg1: p5m4sp180

;for z-only gradients:
;gpz1: 50%
;gpz2: 70%
;gpz3: 31%
;gpz4: 19%
;gpz5: 45%

;use gradient files:
;gpnam1: SMSQ10.100

```

```
;gpnam2: SMSQ10.100  
;gpnam3: SMSQ10.100  
;gpnam4: SMSQ10.100  
;gpnam5: SMSQ10.100
```

```
;use AU-program splitcomb [ipap 2] to process data
```

```
;Processing (exp 3)
```

```
;PHC0(F1): 90  
;PHC1(F1): -180  
;FCOR(F1): 1
```

```
;$Id: $
```



## Pulse sequence CON//**(H)**CAN

```
;ut_con_n_(h)can
;avance-version

;Dataset 1 (F1)
;n_hcan.2
;avance-version
;2D sequence with
; 15N detected correlation for triple resonance using
;   inept transfer steps
;
;   F3(Ha) -> F2(Ca,t1) -> F1(N,t2)
;
;on/off resonance 13C pulses using shaped pulses
;phase sensitive (t1)
;using constant time in t1
;(use parameterset )
;
;M. Gal, K. A. Edmonds, A. G. Milbradt, K. Takeuchi & G. Wagner,
;  J Biomol NMR 51, 497-504 (2011)
;(K. Takeuchi, G. Heffron, Z.-Y. J. Sun, D. P. Frueh & G. Wagner,
;  J Biomol NMR 47, 271-282 (2010))
;
;$CLASS=HighRes
;$DIM=2D
;$TYPE=
;$SUBTYPE=
;$COMMENT=

;Dataset 2 (F2)
;c_con_iasq
;avance-version
;CON
;2D sequence with
; 13C detected correlation for triple resonance using
;   inept transfer steps
;
;   F2(C=O) -> F1(N,t1) -> F2(C=O,t2)
;
;on/off resonance 13C pulses using shaped pulses
;phase sensitive (t1)
;using IPAP scheme for virtual decoupling
;(use parameterset )
;
;W. Bermel, I. Bertini, L. Duma, I.C. Felli, L. Emsley, R. Pierattelli,
;  P.R. Vasos, Angew. Chem. Int. Ed. 44, 3089-3092 (2005)
;(L. Duma, S. Hediger, A. Lesage & L. Emsley,
;  J. Magn. Reson. 164, 187-195 (2003) )
;
;$CLASS=HighRes
;$DIM=2D
;$TYPE=
;$SUBTYPE=
;$COMMENT=

prosol relations=<triple>

#include <Avance.incl>
#include <Delay.incl>
#include <Grad.incl>

"p2=p1*2"
"p22=p21*2"
"d3=1s/(cnst2*cnst12)"
```

```

"d4=1s/ (cnst2*4) "
"d11=30m"
"d12=20u"

"d22=4.5m"
"d23=12.4m"
"d25=16.6m"
"d27=14.3m"

"d32=3u"
"d31=d27/2-d3-p22/2"
"d41=d27/2-larger (p14, p22) /2"
"d51=d23-d27/2-p14/2-p2/2"

"in31=infl/4"
"in32=in2/2"

"in41=in32"
"in51=in32"

"td1=tdmax (td1, d41*2, in42) "

"d1= (d60+d58) *3 +d59+50m"

"DELTA1=d27-d23-p2/2"
"DELTA2=d3-p14/2-p22/2"
"DELTA3=d25/2"
"DELTA4=d23-d25/2-p14"
"DELTA5=d25-d23"
"DELTA6=d25/2-d12+p1*2/PI-de-4u"
"DELTA7=d32*2+p8"
"DELTA8=d23/2-p14/2"
"DELTA9=d23-d22-p14"

"spoff2=0"
"spoff3=0"
"spoff5=bf2* ((cnst21-cnst22)/1000000) "
"spoff7=bf2* ((cnst22-cnst21)/1000000) "
"spoff8=0"
"spoff13=bf2* ((cnst26-cnst21)/1000000) "
"spoff23=bf2* ((cnst23-cnst22)/1000000) "

"l0=0"
"l10=0"

"l3=td1/4"

"acqt0=0"
baseopt_echo

1 4u zel
   4u ze2
   d1

2 d11 do:f1 do:f3
   3m
3 3m
4 9m
5 3m
6 9m
7 3m

;n_hcan

```

```

8 d11 do:f2 do:f3
d60

50u UNBLKGRAD
4u p11:f1 p13:f3

(p1 ph1):f1
p16:gp1
d16 fq=cnst22(bf ppm):f2

(p21 ph1):f3
d4
(center (p14:sp3 ph1):f2 (p22 ph1):f3 )
d4
(p21 ph2):f3

(p13:sp2 ph3):f2
d41
(center (p14:sp5 ph1):f2 (p22 ph1):f3 )
d41
(p14:sp23 ph1):f2
DELTA1
(p2 ph1):f1
d51
(p14:sp5 ph10):f2
DELTA2
(p22 ph1):f3
d31
(p13:sp8 ph4):f2

4u
p16:gp2
d16 p116:f3
20u cpd3:f3

if "10 %2 == 0"
{
(p1 ph5):f1
DELTA3
(p14:sp5 ph1):f2
DELTA4
(p14:sp3 ph1):f2
DELTA5
(p2 ph6):f1
DELTA3
(p14:sp5 ph10):f2
}
else
{
(p1 ph7):f1
(p14:sp5 ph1):f2
DELTA3
DELTA4
(p14:sp3 ph1):f2
DELTA5
(p2 ph6):f1
(p14:sp5 ph10):f2
DELTA3
}

DELTA6
d12 p128:f2
4u BLKGRAD

goscnp1 ph31 cpd2:f2
lo to 8 times 3

```

```
;c_con
```

```

4u do:f2 do:f3
50m
50u UNBLKGRAD

p16:gp3
d16 fq=cnst21(bf ppm):f2

4u p11:f1 p116:f3
4u cpd3:f3

(p13:sp2 ph1):f2
d23
(center (p2 ph1):f1 (p14:sp3 ph1):f2 )
d23
(p13:sp8 ph2):f2

p16:gp4
d16

(p1 ph13):f1
d32
(p8:sp13 ph15):f2
d32
(p2 ph1):f1
DELTA7
(p1 ph14):f1

if "l10 %2 == 0"
{
(p13:sp2 ph1):f2
DELTA8
(p14:sp7 ph1):f2
DELTA8
(center (p2 ph1):f1 (p14:sp3 ph1):f2 )
DELTA8
(p14:sp7 ph1):f2
DELTA8 p119:f1
}
else
{
(p13:sp2 ph16):f2
d22
(p14:sp7 ph1):f2
DELTA9
(center (p2 ph1):f1 (p14:sp3 ph1):f2 )
DELTA8
DELTA8 p119:f1
(p14:sp7 ph1):f2
}

4u BLKGRAD

go2=2 ph30 cpd1:f1

d11 do:f1 do:f3 wr2 #1 if2 #1 zd2

;exp_f2 ipap
3m iu10
lo to 3 times 2

;exp_f2 phase
3m dp13
lo to 4 times 2

3m wr1 #0 if1 #0 zd1

;exp_f1 ipap
3m iu0

```

```

;exp_f2 delay
  3m id32
  lo to 5 times 2

;exp_f1 phase
  3m ip3
  lo to 6 times 2

;exp_f1 delay
  3m id31
  3m dd41
  3m id51

  lo to 7 times 13

exit

ph1=0
ph2=1
ph3=0 2
ph4=0 0 0 0 2 2 2 2
ph5=0 0 2 2
ph6=0 0 0 0 0 0 0 2 2 2 2 2 2 2
ph7=1 1 3 3
ph10=2

ph13=0 2
ph14=0 0 0 0 2 2 2 2
ph15=0 0 2 2
ph16=3

ph29=0
ph30=0 2 0 2 2 0 2 0
ph31=0 2 2 0 2 0 0 2

;p11 : f1 channel - power level for pulse (default)
;p12 : f2 channel - power level for pulse (default)
;p13 : f3 channel - power level for pulse (default)
;p116: f3 channel - power level for CPD/BB decoupling
;p119: f1 channel - power level for CPD/BB decoupling
;p128: f2 channel - power level for CPD/BB decoupling
;sp2: f2 channel - shaped pulse 90 degree (on resonance)
;sp3: f2 channel - shaped pulse 180 degree (on resonance)
;sp5: f2 channel - shaped pulse 180 degree (C=0 off resonance)
;sp7: f2 channel - shaped pulse 180 degree (Ca off resonance)
;sp8: f2 channel - shaped pulse 90 degree (on resonance)
;
  for time reversed pulse
;sp13: f2 channel - shaped pulse 180 degree (adiabatic)
;sp23: f2 channel - shaped pulse 180 degree (Cali off resonance)
;p1 : f1 channel - 90 degree high power pulse
;p2 : f1 channel - 180 degree high power pulse
;p8 : f2 channel - 180 degree shaped pulse for inversion (adiabatic)
;p13: f2 channel - 90 degree shaped pulse
;p14: f2 channel - 180 degree shaped pulse
;p16: homospoil/gradient pulse [1 msec]
;p21: f3 channel - 90 degree high power pulse
;p22: f3 channel - 180 degree high power pulse
;d1 : relaxation delay as executed; 1-5 * T1
;d3 : 1/(n*J(CH)), n = cnst12
;d4 : 1/(4J(CH))
;d11: delay for disk I/O [30 msec]
;d12: delay for power switching [20 usec]
;d16: delay for homospoil/gradient recovery
;d22: 1/(4J(COCa)) [4.5 msec]
;d23: 1/(4J(NCO)) [12.4 msec]
;d25: 1/(4J'(NCO)) [16.6 msec]
;d27: 1/(2J(CaCb)) [14.3 msec]
;d31 : incremented delay (2D, exp 1) = d27/2-d3-p22/2

```

```

;d32 : incremented delay (2D, exp 2) [3 usec]
;d41: decremented delay (2D, exp 1) = d27/2-larger(p14,p22)/2
;d51: incremented delay (2D) = d23-d27/2-p14/2-p2/2
;d58: = AQ of exp 1 (15N)
;d59: = AQ of exp 2 (13C)
;d60: relaxation delay for exp 1
;cnst2: = J(CH) [145 Hz]
;cnst12: for multiplicity selection = 4 for all but Gly, 5 including Gly
;cnst21: CO chemical shift (offset, in ppm)
;cnst22: Calpha chemical shift (offset, in ppm)
;cnst23: Caliphatic chemical shift (offset, in ppm)
;cnst26: Call chemical shift (offset, in ppm) [101 ppm]
;olp: CO chemical shift (cnst21)
;l0 : flag to switch between inphase and antiphase (exp 1)
;l3 : loop for 2D experiment = td1/4
;l10: flag to switch between inphase and antiphase (exp 2)
;inf1: 1/SW(Ca) = 2 * DW(Ca)
;in2 : 1/SW(N) = 2 * DW(N) (inf1 of exp 2)
;in31: 1/(4 * SW(Ca)) = (1/2) DW(Ca)
;nd31: 4
;in32: 1/(2 * SW(N)) = DW(N)
;nd32: 2
;in42: = in32
;in52: = in32
;ns: 4 * n
;ds: >= 32
;td1: number of experiments in F1
; (number of experiments after IPAP processing)
;FnMODE: States-TPPI (or TPPI) in F1
;cpd1: decoupling according to sequence defined by cpdprg1
;cpd2: decoupling according to sequence defined by cpdprg2: p5m4sp180
;cpd3: decoupling according to sequence defined by cpdprg3
;pcpd1: f1 channel - 90 degree pulse for decoupling sequence
;pcpd2: f2 channel - 180 degree pulse for decoupling sequence
;pcpd3: f3 channel - 90 degree pulse for decoupling sequence

;for z-only gradients:
;gpz1: 50%
;gpz2: 40%
;gpz3: 60%
;gpz4: 30%

;use gradient files:
;gpnam1: SMSQ10.100
;gpnam2: SMSQ10.100
;gpnam3: SMSQ10.100
;gpnam4: SMSQ10.100

;use AU-program splitcomb [ipap 2] to process data

;$Id: $

```
